# Supplementary material for: Evolution of the dynamics, area, and ice production of the Amundsen Sea Polynya, Antarctica, 2016–2021
Source: Copernicus journal article supplement (doi:10.5194/tc-17-457-2023), 2023-02-03
Supplement: Supplementary file [file tc-17-457-2023-supplement.pdf]

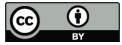

*Supplement of*

## **Evolution of the dynamics, area, and ice production of the Amundsen Sea Polynya, Antarctica, 2016–2021**

**Grant J. Macdonald et al.**

*Correspondence to:* Grant J. Macdonald ([grantmacdonald@uvic.ca](mailto:grantmacdonald@uvic.ca))

The copyright of individual parts of the supplement might differ from the article licence.

## Supplementary Figures

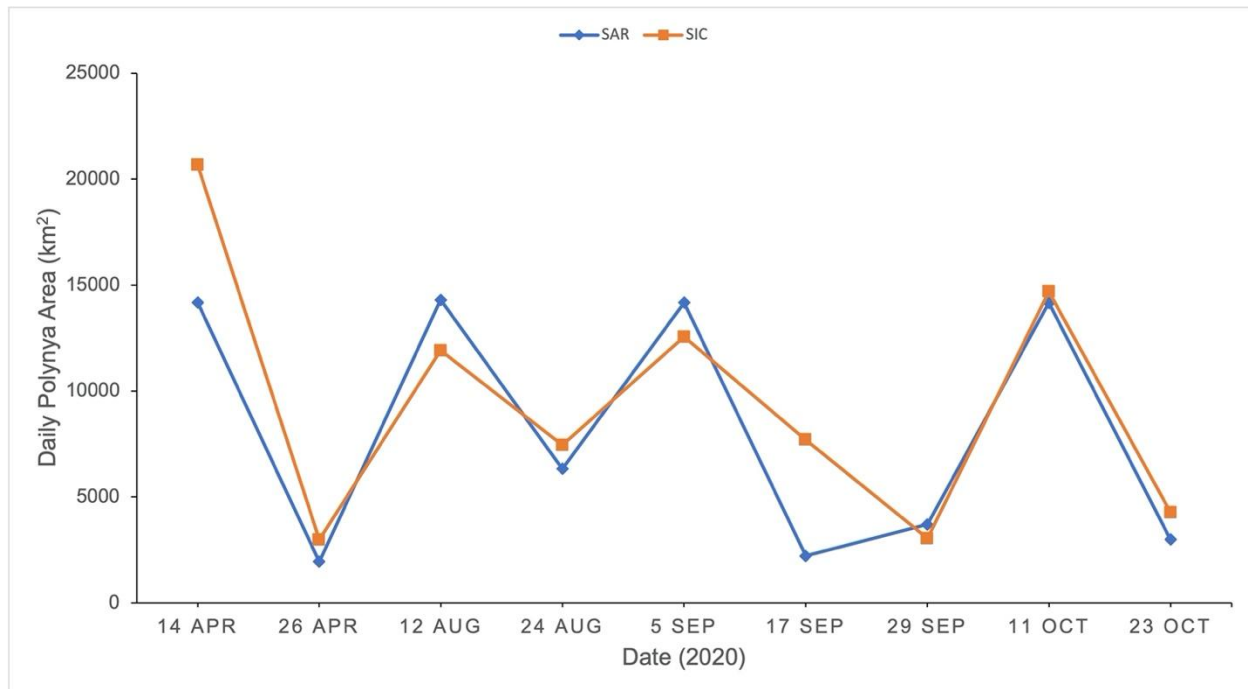

**Fig. S1.** Daily active polynya area for select dates in 2020 as measured manually from Sentinel-1 SAR imagery (blue diamonds) and from SIC data (orange squares) on the same dates.

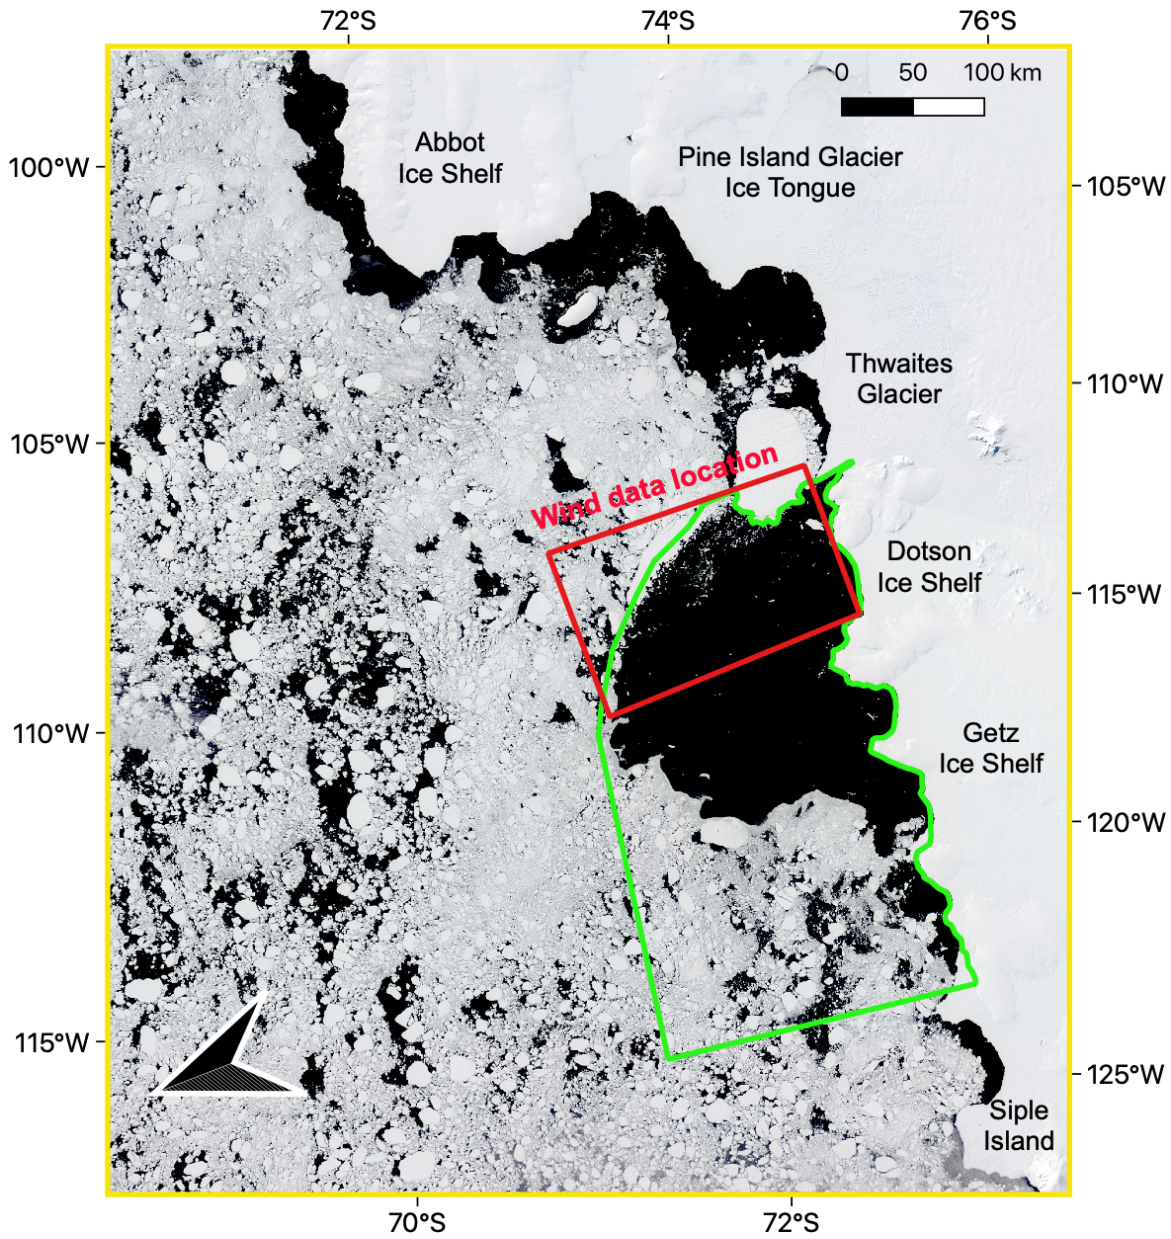

**Fig. S2.** The red boundary shows the region used to calculate daily wind speed at the ASP as shown in Figs.8; S3; S5. The whole ASP study area is shown by the green boundary. The background image is the same true-color MODIS image from 12 December 2020 shown in Fig 1b.

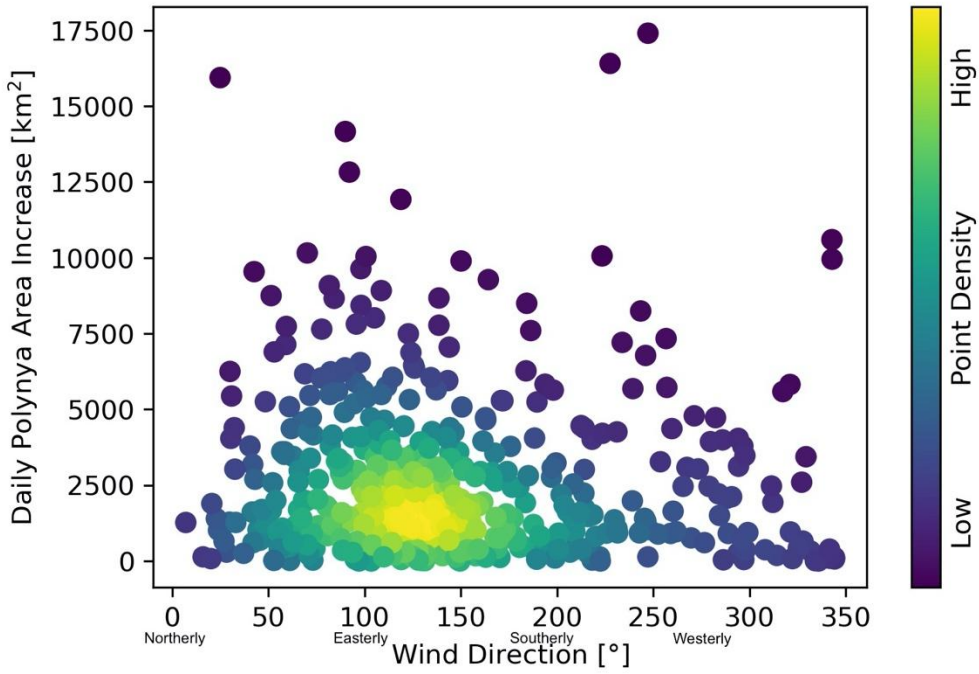

**Fig. S3.** Daily increases in active polynya area plotted against wind direction for all winter (April-October) instances, 2017-2020. The color indicates the density of the distribution of points as measured using a kernel-density estimate using Gaussian kernels.

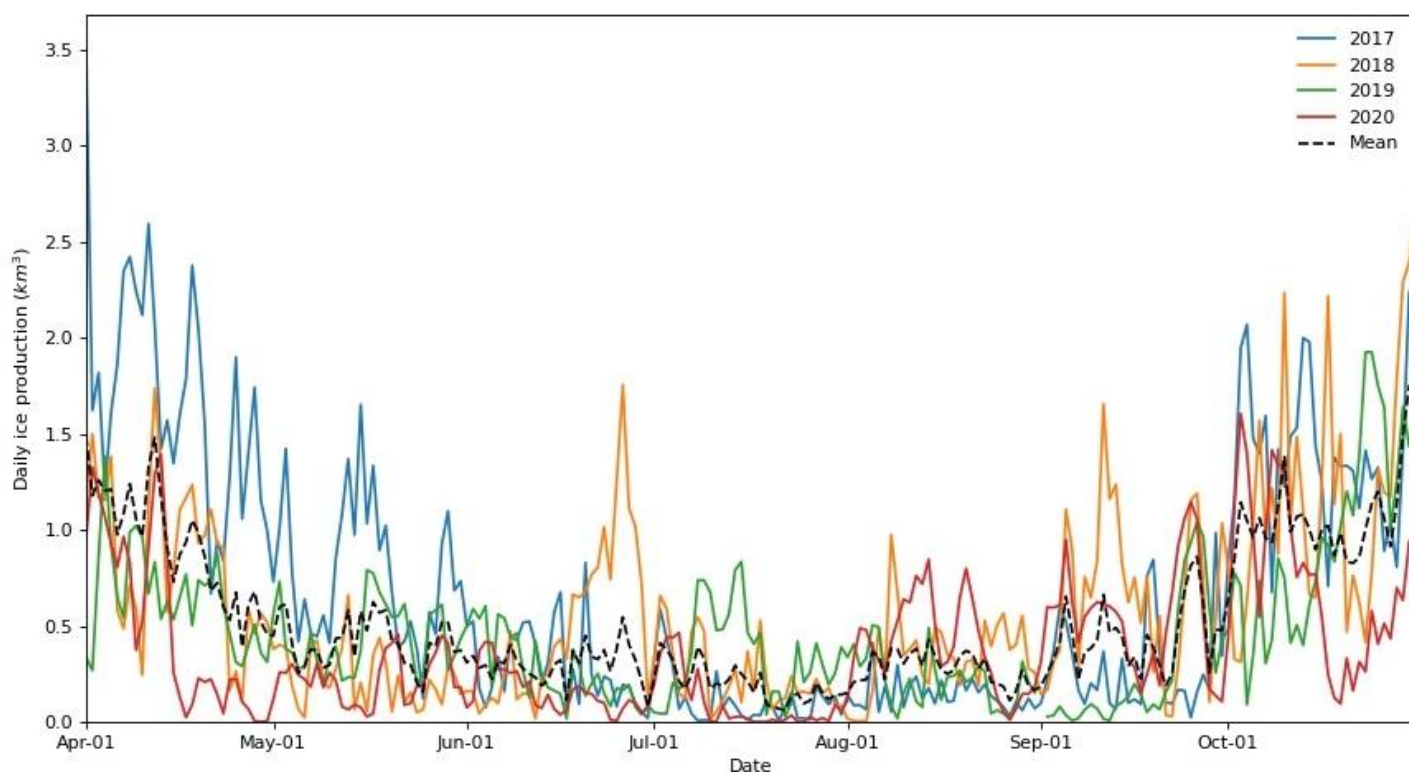

**Fig. S4.** Daily winter (April-October) ice production for each winter 2017-2020, and the daily mean for the whole period, as measured using heat-flux modelling of ERA-5 data and AMSR-2 SIC data.

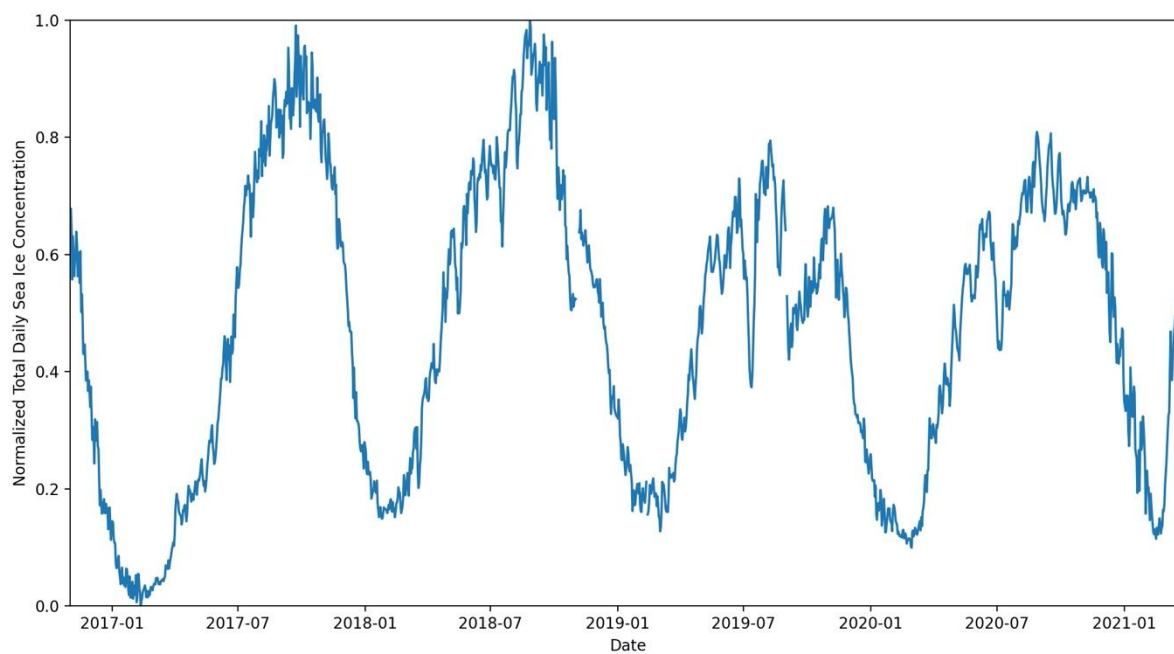

**Fig. S5.** Total daily SIC from 1 November 2016 to 31 March 2021 for the broader region defined by the red box in Fig. 1a.



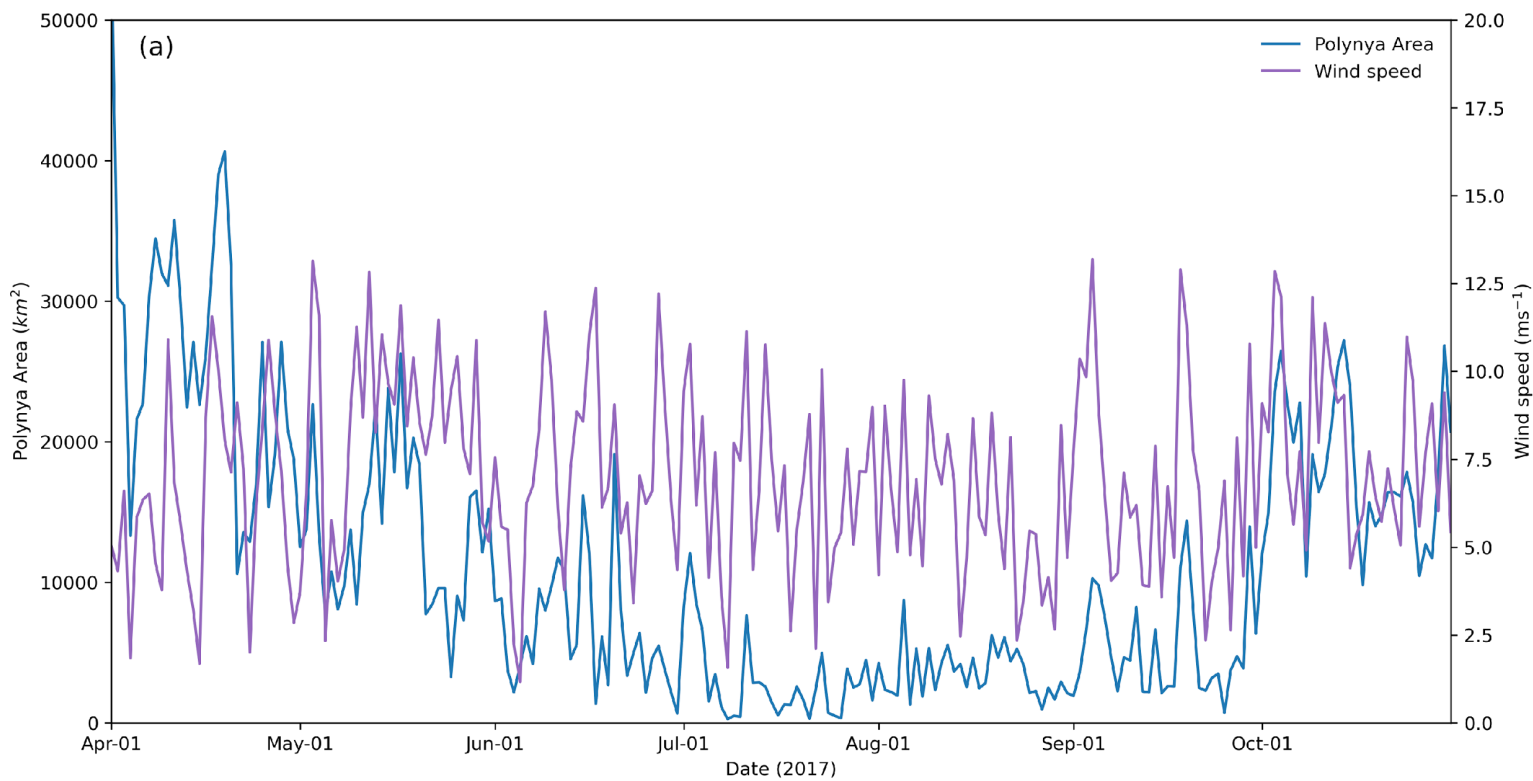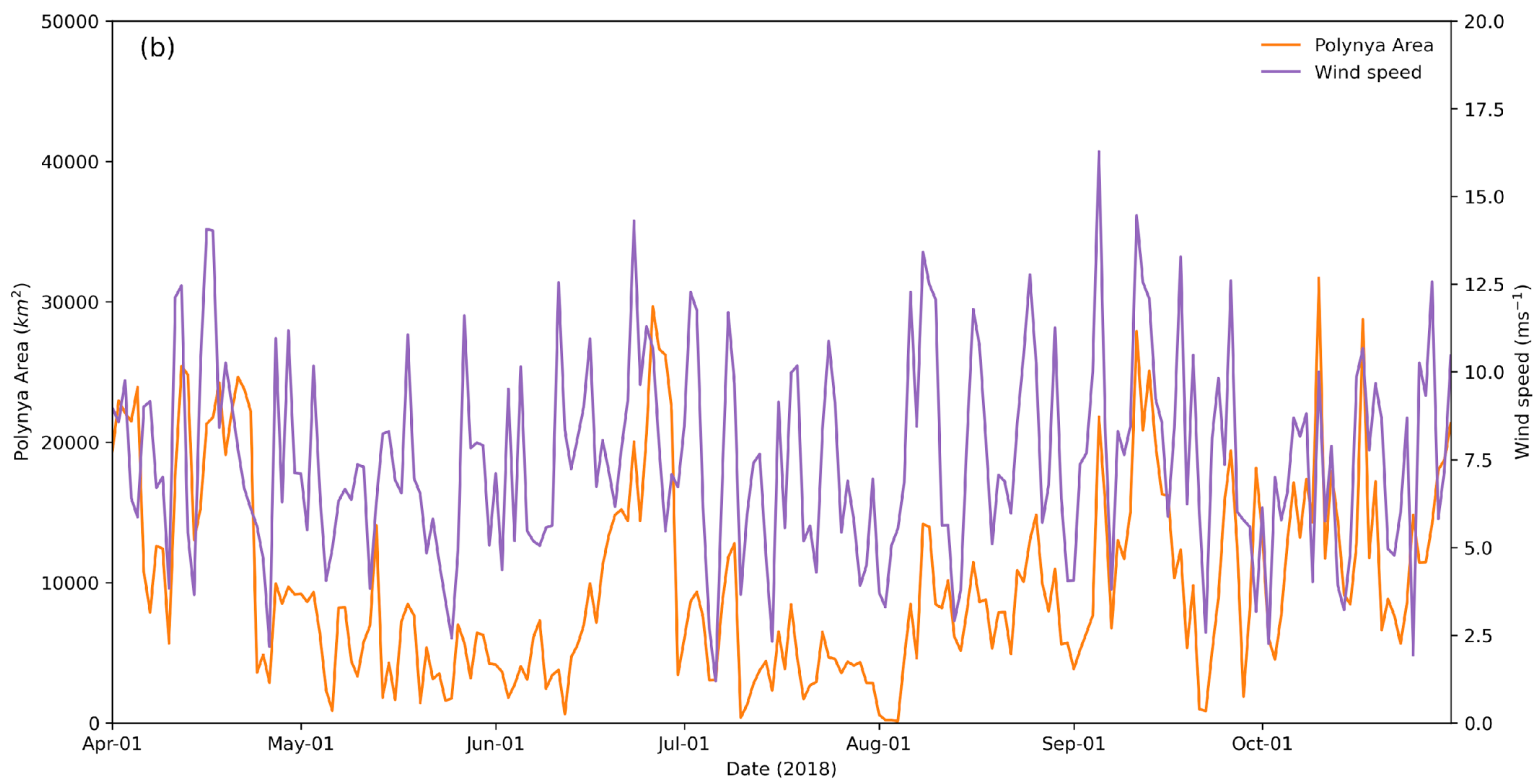

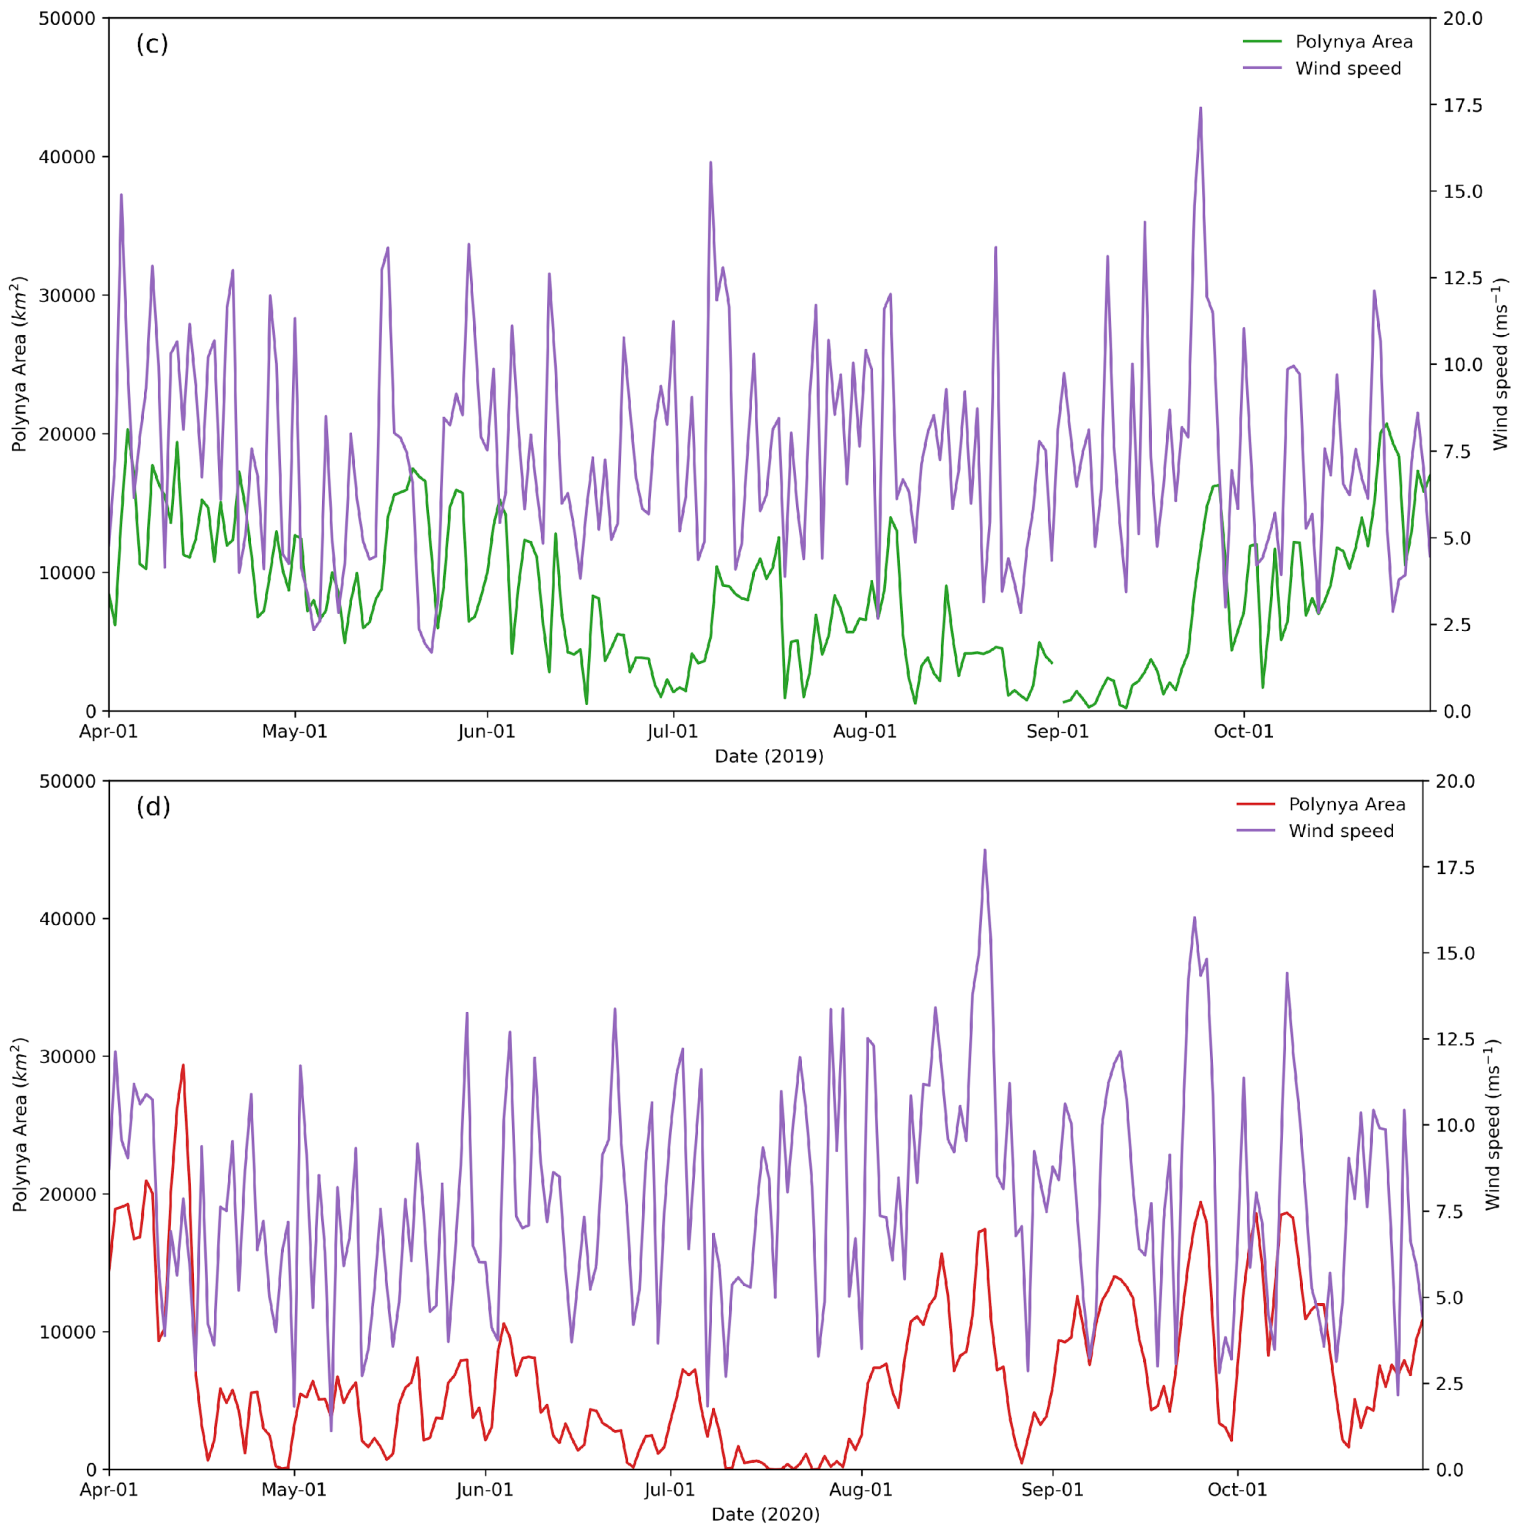

**Fig. S6.** Daily wind speed and polynya area during the winters (April-October) of (a) 2017, (b) 2018, (c) 2019 and (d) 2020
